# Supplementary material
Source: PubMed Central journal article supplement (PMC5849397)
Supplement: NIHMS926228-supplement.pdf [file NIHMS926228-supplement.pdf]

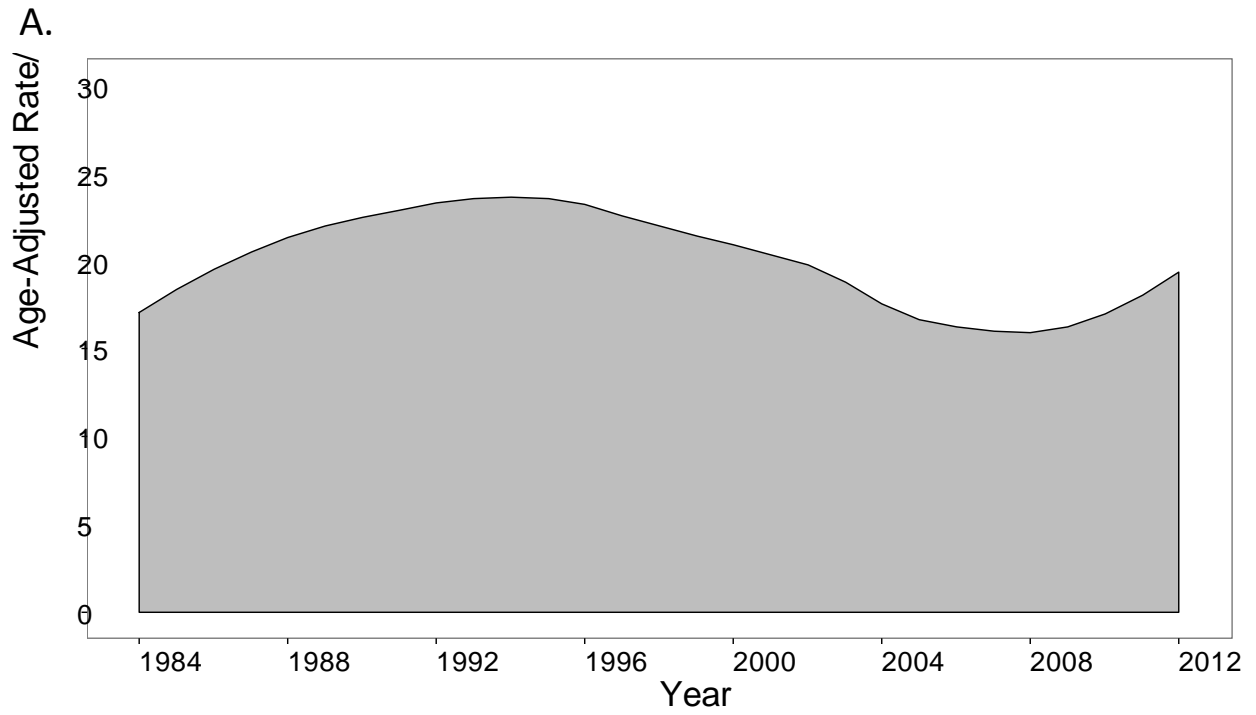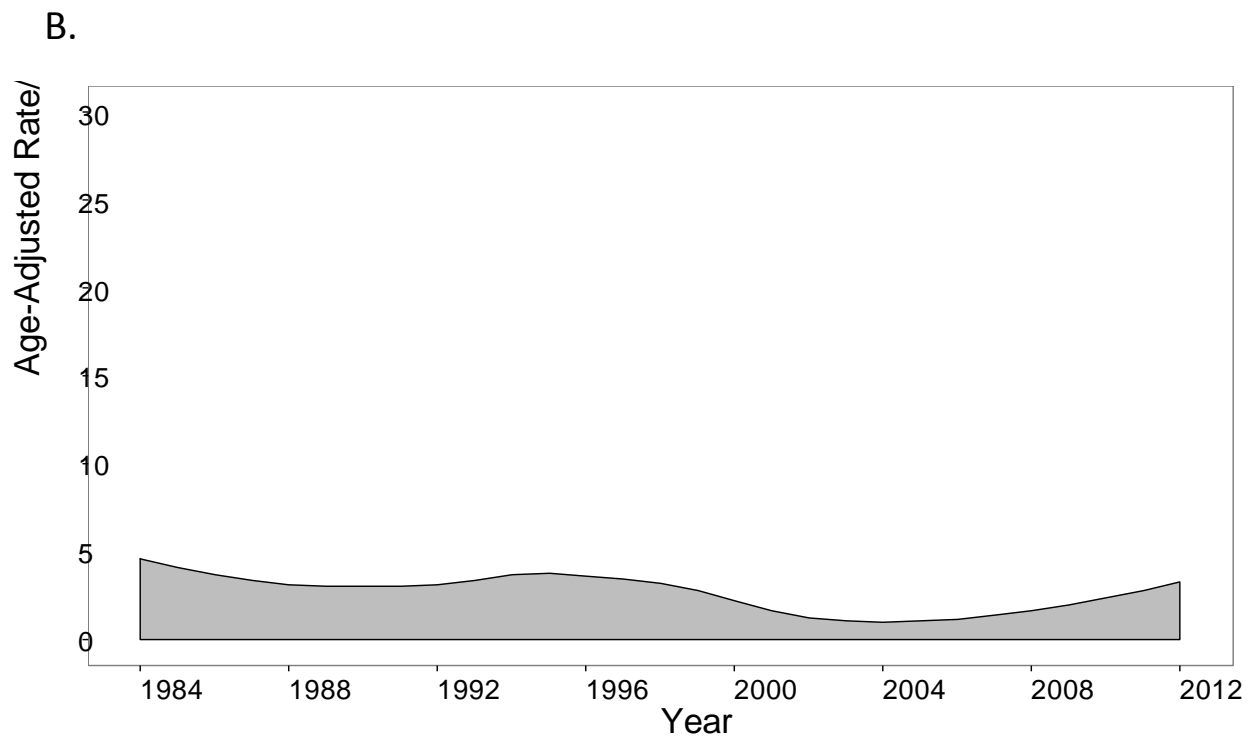

**Supplemental Figure 1.** Incidence of bladder stones in A) men and B) women from 1984 to 2012 in Olmsted County, Minnesota

A.

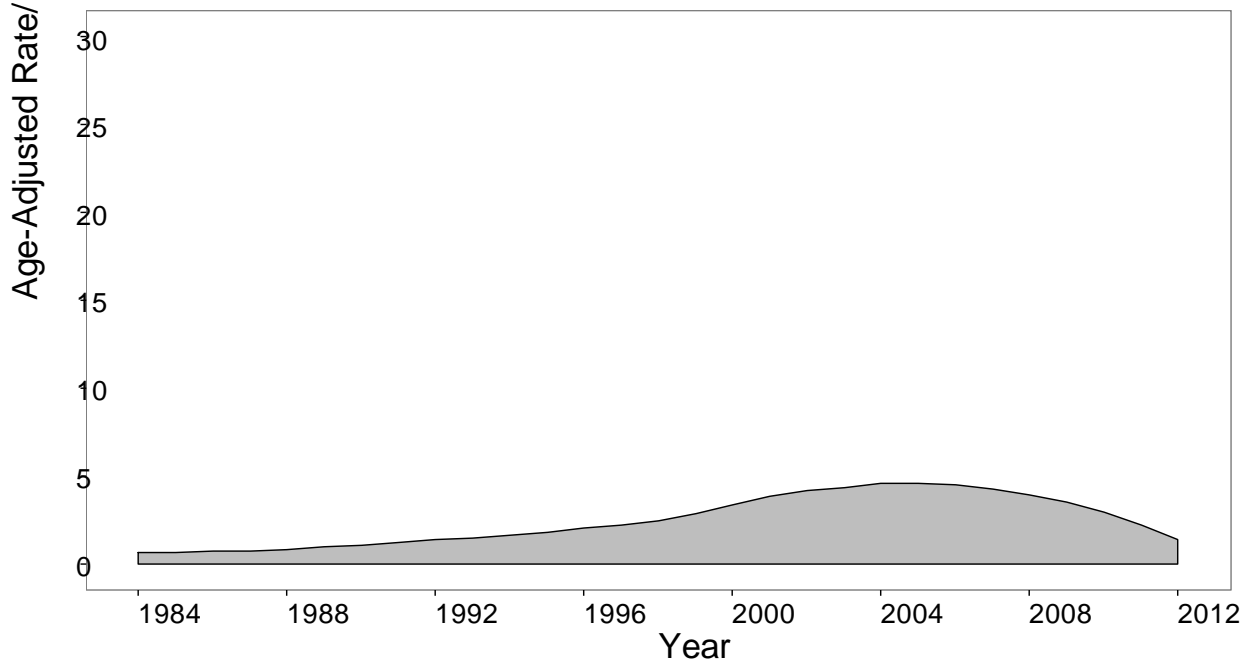

B.

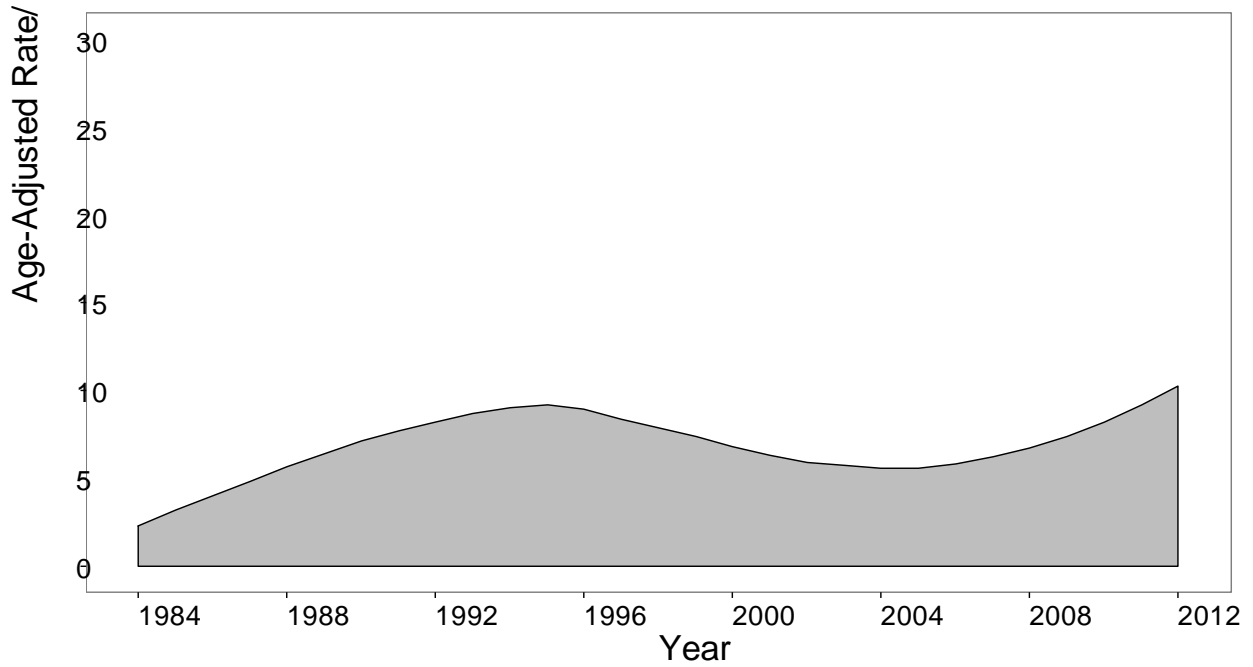

**Supplemental Figure 2.** Incidence of infected stones in A) men and B) women from 1984 to 2012 in Olmsted County, Minnesota
